# Supplementary material for: Routine Fecal Occult Blood Screening and Colorectal Cancer Mortality in Sweden
Source: PubMed Central journal article supplement (PMC10900849; doi:10.1001/jamanetworkopen.2024.0516), 2024-02-27
Supplement: jamanetwopen-e240516-s001.pdf [file jamanetwopen-e240516-s001.pdf]

## Data Sharing Statement

Blom. Routine Fecal Occult Blood Screening and Colorectal Cancer Mortality in Sweden.  
*JAMA Netw Open*. Published February 27, 2024. doi:10.1001/jamanetworkopen.2024.0516

### Data

**Data available:** No

### Additional Information

**Explanation for why data not available:** The de-identified data are available for research upon request to Principal Investigator Johannes Blom and within the framework of the Swedish data protection legislation and any required permissions from authorities.
